# Supplementary material for: Enzymatic deacidification of the rice bran oil and simultaneous preparation of phytosterol esters-enriched functional oil catalyzed by immobilized lipase arrays
Source: Royal Society of Chemistry journal article supplement (doi:10.1039/c5ra11533g), 2015-01-01
Supplement: c5ra11533g1.pdf [file c5ra11533g1.pdf]

**Electronic Supplementary Information (ESI) for:**

**Enzymatic deacidification of the rice bran oil and simultaneous preparation of phytosterol esters-enriched functional oil catalyzed by immobilized lipase arrays**

Mingming Zheng,<sup>a</sup> Jiuxia Zhu,<sup>b</sup> Fenghong Huang,<sup>\*a,c</sup> Xia Xiang<sup>a</sup>, Jie Shi<sup>a</sup>, Qianchun Deng,<sup>a,c</sup> Fangli Ma<sup>c</sup> and Yuqi Feng<sup>\*b</sup>

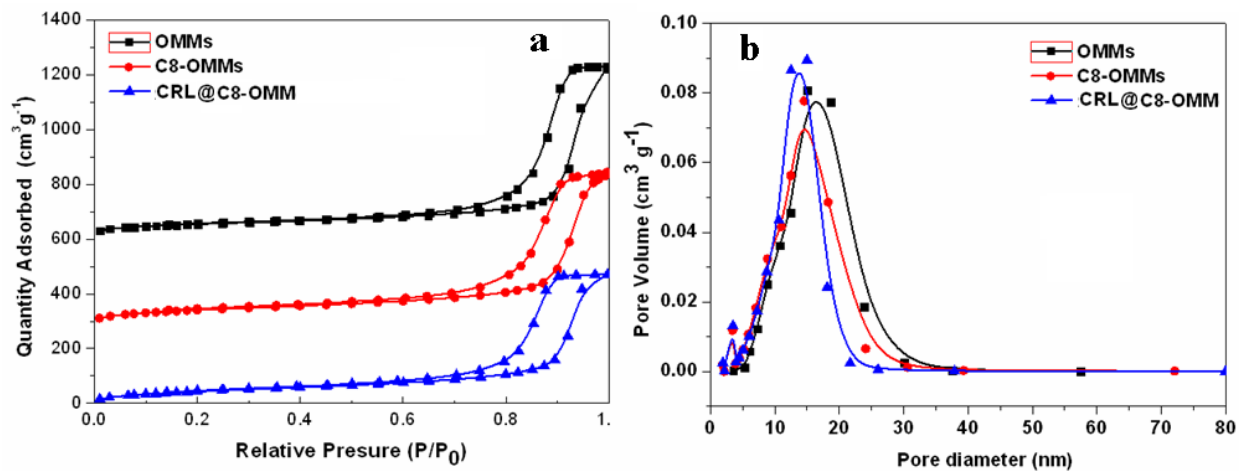

**Fig. S1.** Isotherms (a) and pore diameter distributions (b) of the OMMs, C8-OMMs and CRL@C8-OMMs.
